# Supplementary material for: Long-Term Fertilization Mediates Microbial Keystone Taxa to Regulate Straw-Derived 13C Incorporation in Soil Aggregates
Source: MDPI journal article supplement (doi:10.3390/agronomy15092116), 2025-09-02
Supplement: s1 [file agronomy-3802621-supplementary.pdf › agronomy-3802621-supplementary.pdf]

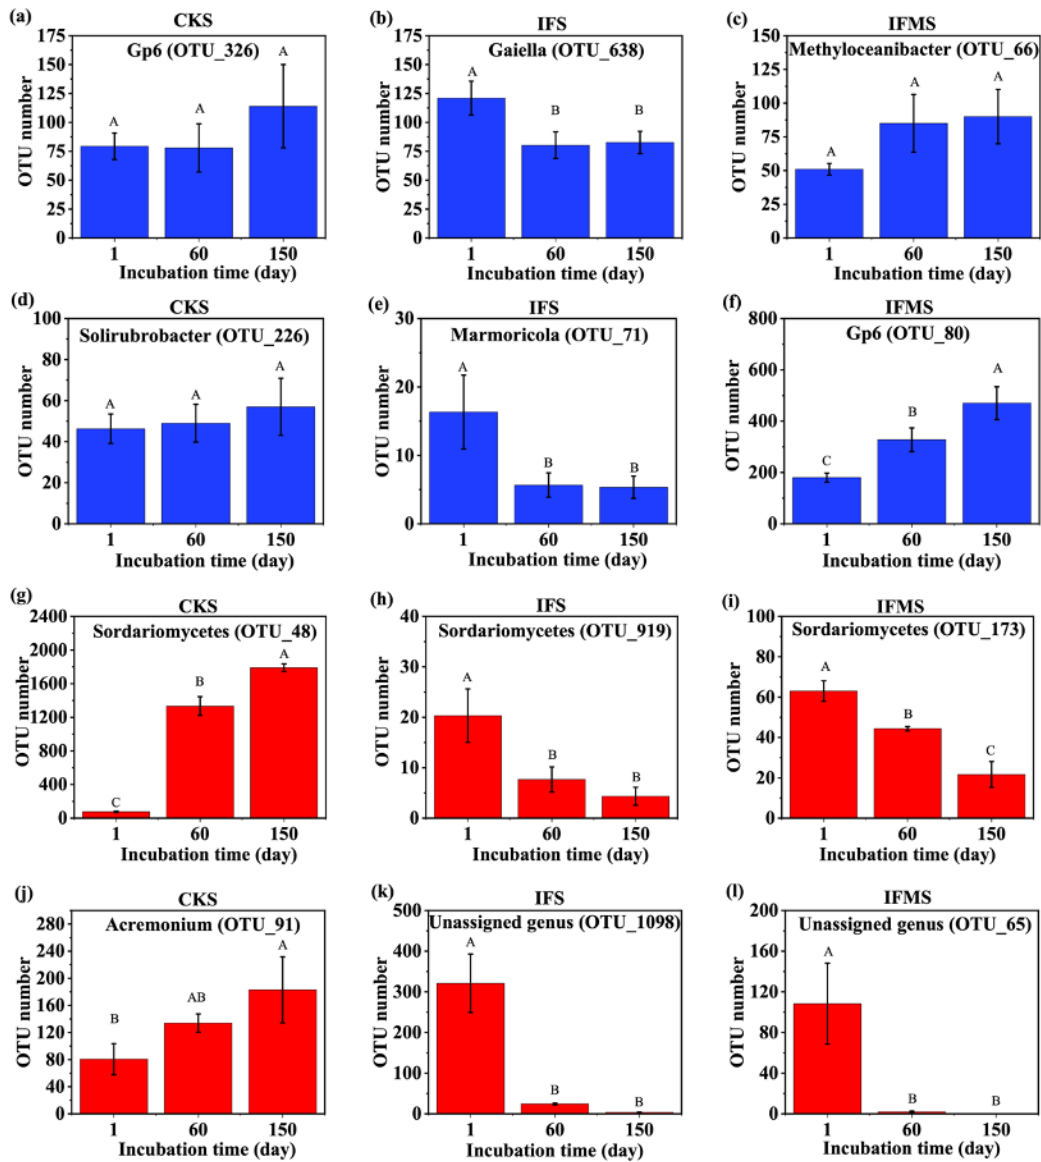

**Figure S1 Dynamic changes of microbial activities of bacterial keystone taxa in macroaggregate (a-c) and in microaggregates (d-f), and fungal keystone taxa in macroaggregate (g-i) and in microaggregates (j-l).**

Note: Treatments including CKS (control + straw) (a), IFS (inorganic fertilizer + straw) (b), IFMS (inorganic fertilizer plus manure + straw) (c) in macroaggregate, and CKS (control + straw) (d), IFS (inorganic fertilizer + straw) (e), IFMS (inorganic fertilizer plus manure + straw) (f) in microaggregate. The values presented in the figures are given as mean  $\pm$  standard errors. Different capital letters indicated significant differences ( $P < 0.05$ ) among different incubation periods.

**Table S1**

Soil basic properties of different fertilizer management strategies in 2018.

| Treatment | SOC (g kg <sup>-1</sup> ) | $\delta^{13}\text{C}$ (‰) | TN (g kg <sup>-1</sup> ) | C/N ratio  | AP (mg kg <sup>-1</sup> ) | AK (mg kg <sup>-1</sup> ) |
|-----------|---------------------------|---------------------------|--------------------------|------------|---------------------------|---------------------------|
| CK        | 15.0±0.1 b                | -18.8±0.0 a               | 1.4±0.1 c                | 10.6±0.4 a | 15.32±0.75 c              | 65.04±3.18 c              |
| IF        | 15.0±0.1 b                | -19.4±0.0 c               | 1.5±0.0 b                | 9.7±0.0 b  | 20.90±0.70 b              | 81.42±1.40 b              |
| IFM       | 25.2±0.2 a                | -19.1±0.1 b               | 2.6±0.0 a                | 9.7±0.0 b  | 80.66±2.56 a              | 137.37±3.87 a             |

Note: The C denotes no fertilization control treatment, the IF denotes inorganic fertilizer treatment, the IFM denotes inorganic fertilizer plus manure treatment. SOC denotes soil organic carbon, TN denotes total nitrogen, C/N denotes the ratio of SOC and total nitrogen, AP denotes available phosphorous, AK denotes available potassium. Different lowercase letters mean significant differences ( $P < 0.05$ ) in various fertilizer management strategies.

**Table S2**

Topological properties of bacterial network in soil aggregates.

| Aggregate size | Parameter                  | CK       | CKS      | IF       | IFS      | IFM      | IFMS     |
|----------------|----------------------------|----------|----------|----------|----------|----------|----------|
| Macroaggregate | Num.edges                  | 458      | 301      | 613      | 219      | 108      | 298      |
|                | pos.edges (percentage)     | 446 (97) | 286 (95) | 605 (98) | 166 (75) | 98 (90)  | 268 (90) |
|                | neg.edges (percentage)     | 12 (3)   | 15 (5)   | 8 (2)    | 53 (25)  | 10 (10)  | 30 (10)  |
|                | num.vertices               | 181      | 152      | 186      | 141      | 118      | 150      |
|                | connectance                | 0.03     | 0.03     | 0.04     | 0.02     | 0.02     | 0.03     |
|                | average.degree             | 5.06     | 3.96     | 6.59     | 3.11     | 1.83     | 3.97     |
|                | average.path.length        | 3.97     | 4.33     | 5.75     | 6.03     | 4.41     | 4.10     |
|                | diameter                   | 15       | 12       | 19       | 16       | 14       | 11       |
|                | clustering.coefficient     | 0.58     | 0.54     | 0.52     | 0.44     | 0.46     | 0.43     |
|                | no.clusters                | 22       | 20       | 9        | 16       | 30       | 15       |
|                | centralization.degree      | 0.09     | 0.07     | 0.12     | 0.04     | 0.04     | 0.09     |
|                | centralization.betweenness | 0.04     | 0.09     | 0.36     | 0.13     | 0.03     | 0.06     |
| Microaggregate | Num.edges                  | 340      | 321      | 241      | 295      | 212      | 577      |
|                | pos.edges (percentage)     | 339 (99) | 288 (89) | 219 (90) | 292 (98) | 209 (98) | 532 (92) |
|                | neg.edges (percentage)     | 1 (1)    | 33 (11)  | 22 (10)  | 3 (2)    | 3 (2)    | 45 (8)   |
|                | num.vertices               | 161      | 189      | 153      | 162      | 150      | 190      |
|                | connectance                | 0.03     | 0.02     | 0.02     | 0.02     | 0.02     | 0.03     |
|                | average.degree             | 4.22     | 3.40     | 3.15     | 3.64     | 2.83     | 6.07     |
|                | average.path.length        | 5.40     | 4.50     | 6.84     | 6.87     | 4.62     | 5.88     |
|                | diameter                   | 14       | 14       | 16       | 18       | 12       | 16       |
|                | clustering.coefficient     | 0.49     | 0.44     | 0.47     | 0.46     | 0.45     | 0.53     |
|                | no.clusters                | 16       | 14       | 19       | 17       | 21       | 11       |
|                | centralization.degree      | 0.06     | 0.05     | 0.06     | 0.05     | 0.04     | 0.08     |
|                | centralization.betweenness | 0.18     | 0.04     | 0.15     | 0.17     | 0.05     | 0.20     |

**Table S3**

Topological properties of fungal network in soil aggregates.

| Aggregate size | Parameter                  | CK      | CKS     | IF       | IFS     | IFM     | IFMS    |
|----------------|----------------------------|---------|---------|----------|---------|---------|---------|
| Macroaggregate | Num.edges                  | 17      | 15      | 23       | 35      | 28      | 27      |
|                | pos.edges (percentage)     | 11 (65) | 10 (67) | 22 (96)  | 24 (69) | 21 (75) | 19 (70) |
|                | neg.edges (percentage)     | 6 (35)  | 5 (33)  | 1 (4)    | 11 (31) | 7 (25)  | 8 (30)  |
|                | num.vertices               | 23      | 23      | 32       | 36      | 28      | 33      |
|                | connectance                | 0.07    | 0.06    | 0.05     | 0.06    | 0.07    | 0.05    |
|                | average.degree             | 1.48    | 1.30    | 1.44     | 1.94    | 2.00    | 1.64    |
|                | average.path.length        | 1.73    | 1.82    | 2.04     | 1.97    | 1.67    | 1.75    |
|                | diameter                   | 4       | 5       | 5        | 5       | 4       | 4       |
|                | clustering.coefficient     | 0.38    | 0.00    | 0.35     | 0.43    | 0.50    | 0.55    |
|                | no.clusters                | 8       | 8       | 11       | 9       | 9       | 11      |
|                | centralization.degree      | 0.11    | 0.03    | 0.05     | 0.12    | 0.15    | 0.07    |
|                | centralization.betweenness | 0.05    | 0.02    | 0.02     | 0.03    | 0.03    | 0.02    |
| Microaggregate | Num.edges                  | 77      | 43      | 119      | 110     | 65      | 76      |
|                | pos.edges (percentage)     | 54 (70) | 37 (86) | 114 (96) | 85 (77) | 59 (91) | 74 (97) |
|                | neg.edges (percentage)     | 23 (30) | 6 (14)  | 5 (4)    | 25 (23) | 6 (9)   | 2 (3)   |
|                | num.vertices               | 51      | 46      | 60       | 65      | 57      | 54      |
|                | connectance                | 0.06    | 0.04    | 0.07     | 0.05    | 0.04    | 0.05    |
|                | average.degree             | 3.02    | 1.87    | 3.97     | 3.38    | 2.28    | 2.81    |
|                | average.path.length        | 3.21    | 3.19    | 3.61     | 3.35    | 3.42    | 2.35    |
|                | diameter                   | 8       | 9       | 8        | 10      | 8       | 7       |
|                | clustering.coefficient     | 0.49    | 0.46    | 0.63     | 0.53    | 0.38    | 0.57    |
|                | no.clusters                | 6       | 12      | 6        | 7       | 10      | 11      |
|                | centralization.degree      | 0.12    | 0.07    | 0.10     | 0.17    | 0.08    | 0.15    |
|                | centralization.betweenness | 0.15    | 0.05    | 0.18     | 0.12    | 0.10    | 0.03    |

**Table S4**

The keystone taxa in the bacterial networks in soil aggregates.

| Aggregate size | Treatment | OTU ID  | Phylum         | Genus              | Degree | Closeness centrality | Betweenness centrality |
|----------------|-----------|---------|----------------|--------------------|--------|----------------------|------------------------|
| Macroaggregate | CKS       | OTU_326 | Acidobacteria  | Gp6                | 15     | 0.009                | 62                     |
|                | IFS       | OTU_638 | Actinobacteria | Gaiella            | 9      | 0.023                | 664                    |
|                | IFMS      | OTU_66  | Proteobacteria | Methyloceanibacter | 18     | 0.014                | 621                    |
| Microaggregate | CKS       | OTU_226 | Actinobacteria | Solirubrobacter    | 10     | 0.008                | 656                    |
|                | IFS       | OTU_71  | Actinobacteria | Marmoricola        | 11     | 0.015                | 340                    |
|                | IFMS      | OTU_80  | Acidobacteria  | Gp6                | 21     | 0.022                | 1466                   |

**Table S5**

The keystone taxa in the fungal networks in soil aggregates.

| Aggregate size | Treatment | OTU ID   | Phylum     | Genus       | Degree | Closeness centrality | Betweenness centrality |
|----------------|-----------|----------|------------|-------------|--------|----------------------|------------------------|
| Macroaggregate | CKS       | OTU_48   | Ascomycota | Podospora   | 2      | 0.055                | 6                      |
|                | IFS       | OTU_919  | Ascomycota | Myrothecium | 6      | 0.036                | 9                      |
|                | IFMS      | OTU_173  | Ascomycota | Trichoderma | 4      | 0.038                | 8                      |
| Microaggregate | CKS       | OTU_91   | Ascomycota | Acremonium  | 5      | 0.026                | 12                     |
|                | IFS       | OTU_1098 | Unassigned | Unassigned  | 14     | 0.033                | 255                    |
|                | IFMS      | OTU_65   | Unassigned | Unassigned  | 11     | 0.028                | 24                     |
